# Supplementary material for: Nanoporous Ag-Au Bimetallic Triangular Nanoprisms Synthesized by Galvanic Replacement for Plasmonic Applications
Source: Hindawi journal article supplement (doi:10.1155/2018/1263942), 2018-06-27
Supplement: f1 [file 1263942.f1.docx]

Supplementary material

**Nanoporous Ag-Au Bimetallic triangular Nano-prisms Synthesized by Galvanic Replacement for Plasmonic Applications**

**Hongmei Qian 1,*, Shoaib Anwer 2, G. Bharath 3, Shahid Iqbal 4, Lijuan Chen 5**

1 Department of Architecture and Civil Engineering, West Anhui University, Anhui 237012, China

2 Department of Mechanical Engineering, Khalifa University of Science and Technology, Abu Dhabi 127788, United Arab Emirates

3 Department of Chemical Engineering, Khalifa University of Science and Technology, Abu Dhabi 127788, United Arab Emirates

4 International Research Center for Renewable Energy, State Key Laboratory of Multiphase Flow in Power Engineering, Xi'an Jiaotong University, Shaanxi 710049, China

5 College of Materials and Chemical Engineering, West Anhui University, Anhui 237012, China

* Correspondence should be addressed to Hongmei Qian; qianhm@wxc.edu.cn


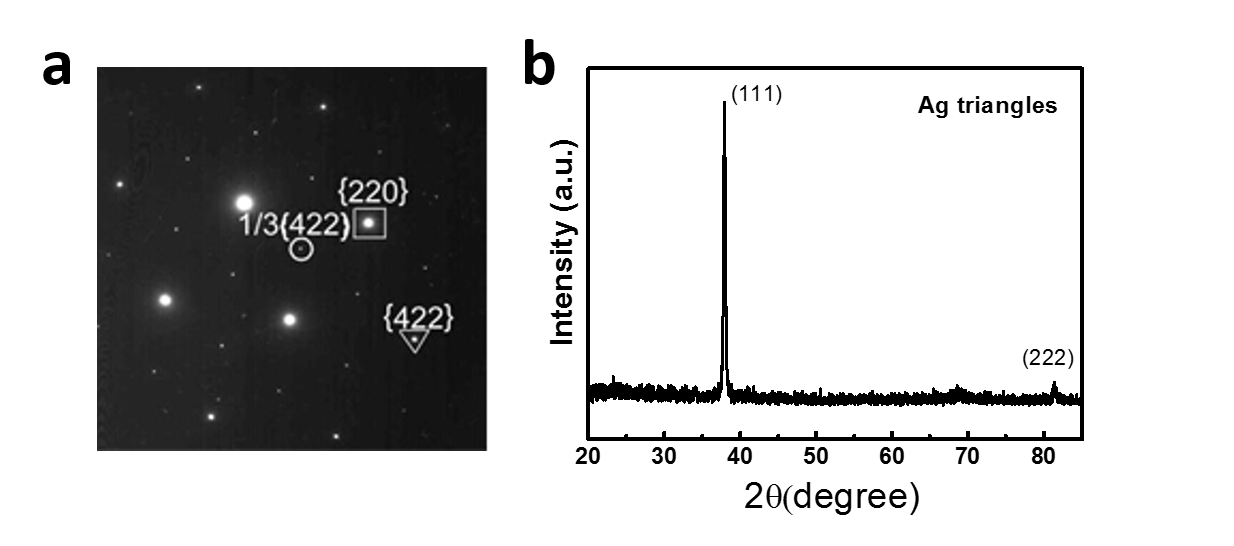


**Figure S1** (a) The selected-area electron diffraction pattern of one flat-lying Ag TNP with its top surface perpendicular to the electron beam, in which the spots enclosed in the rectangle, triangle and circle correspond to the {220}, {422} and 1/3{422} Bragg reflections of face-centered cubic silver, respectively. The existence of {220} reflection indicates that the Ag TNP were single crystals with {111} planes as the basal planes. (b) XRD pattern of Ag nanoplate.


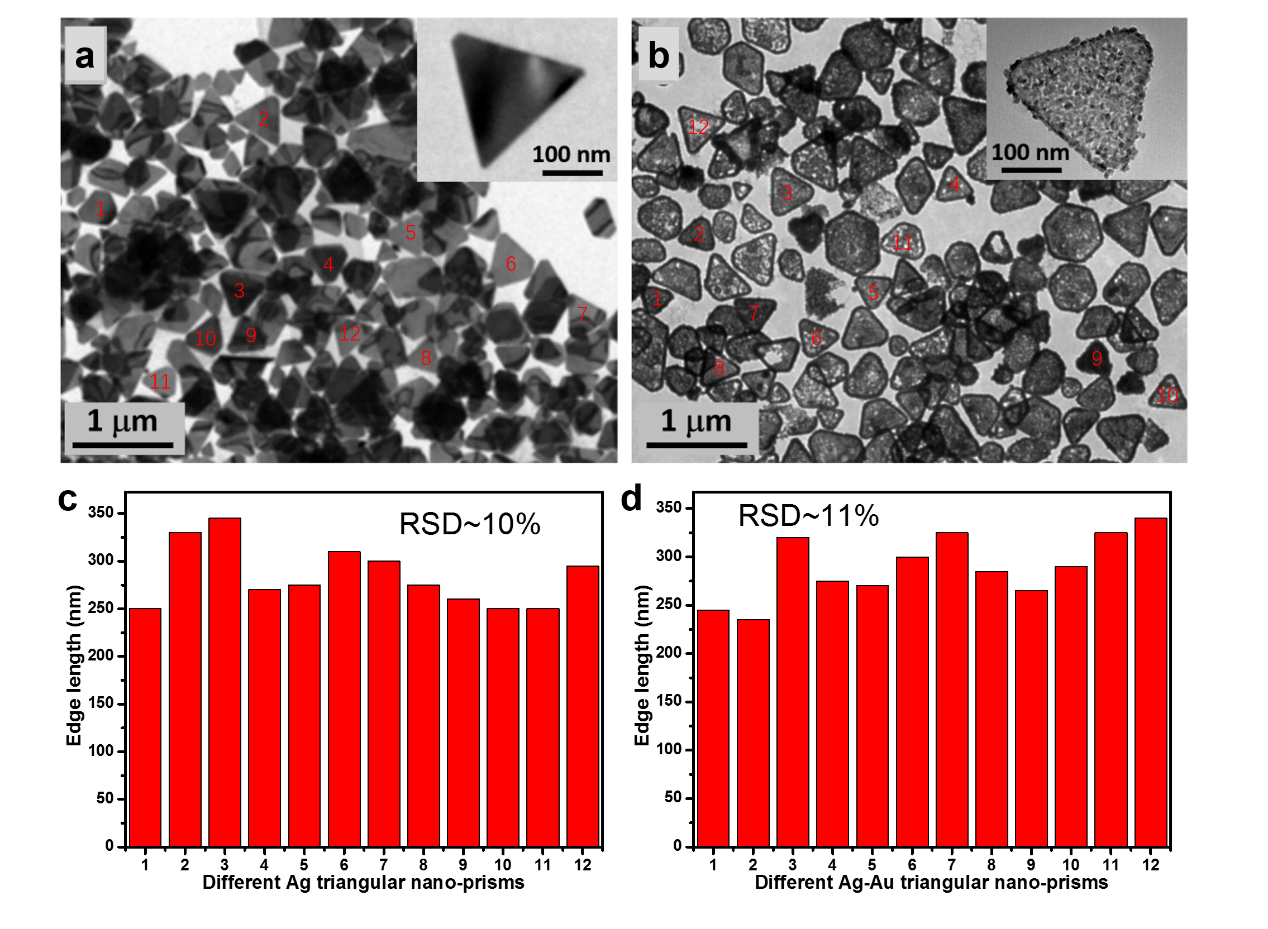


**Figure S2 The statistics of the average size of TNPs before and after the galvanic displacement.** (a) The TEM image of the as-prepared Ag TNP with sharp corners and smooth surface; (b) The TEM image of the as-prepared nanoporous Ag-Au TNPs; (c) The edge length statistics of Ag TNPs indicated in (a), The average size is about 284 nm with relative standard deviation (RSD) 10 %; (d) The edge length statistics of Ag-Au TNPs indicated in (b), The average size is about 289 nm with relative standard deviation (RSD) 11 %.


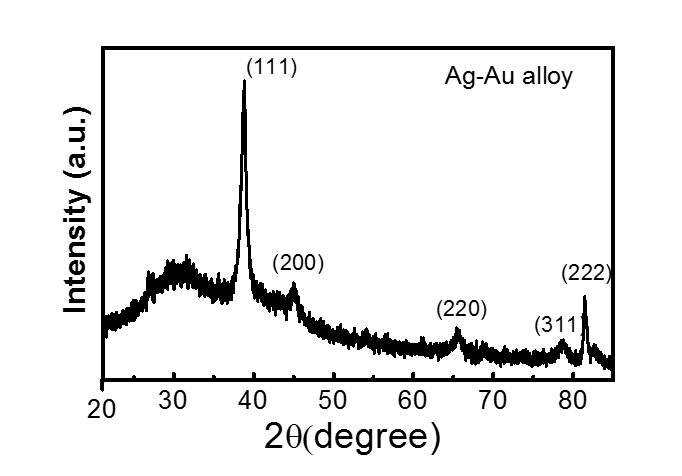


**Figure S3** XRD pattern of roughened Ag-Au alloyed TNPs.


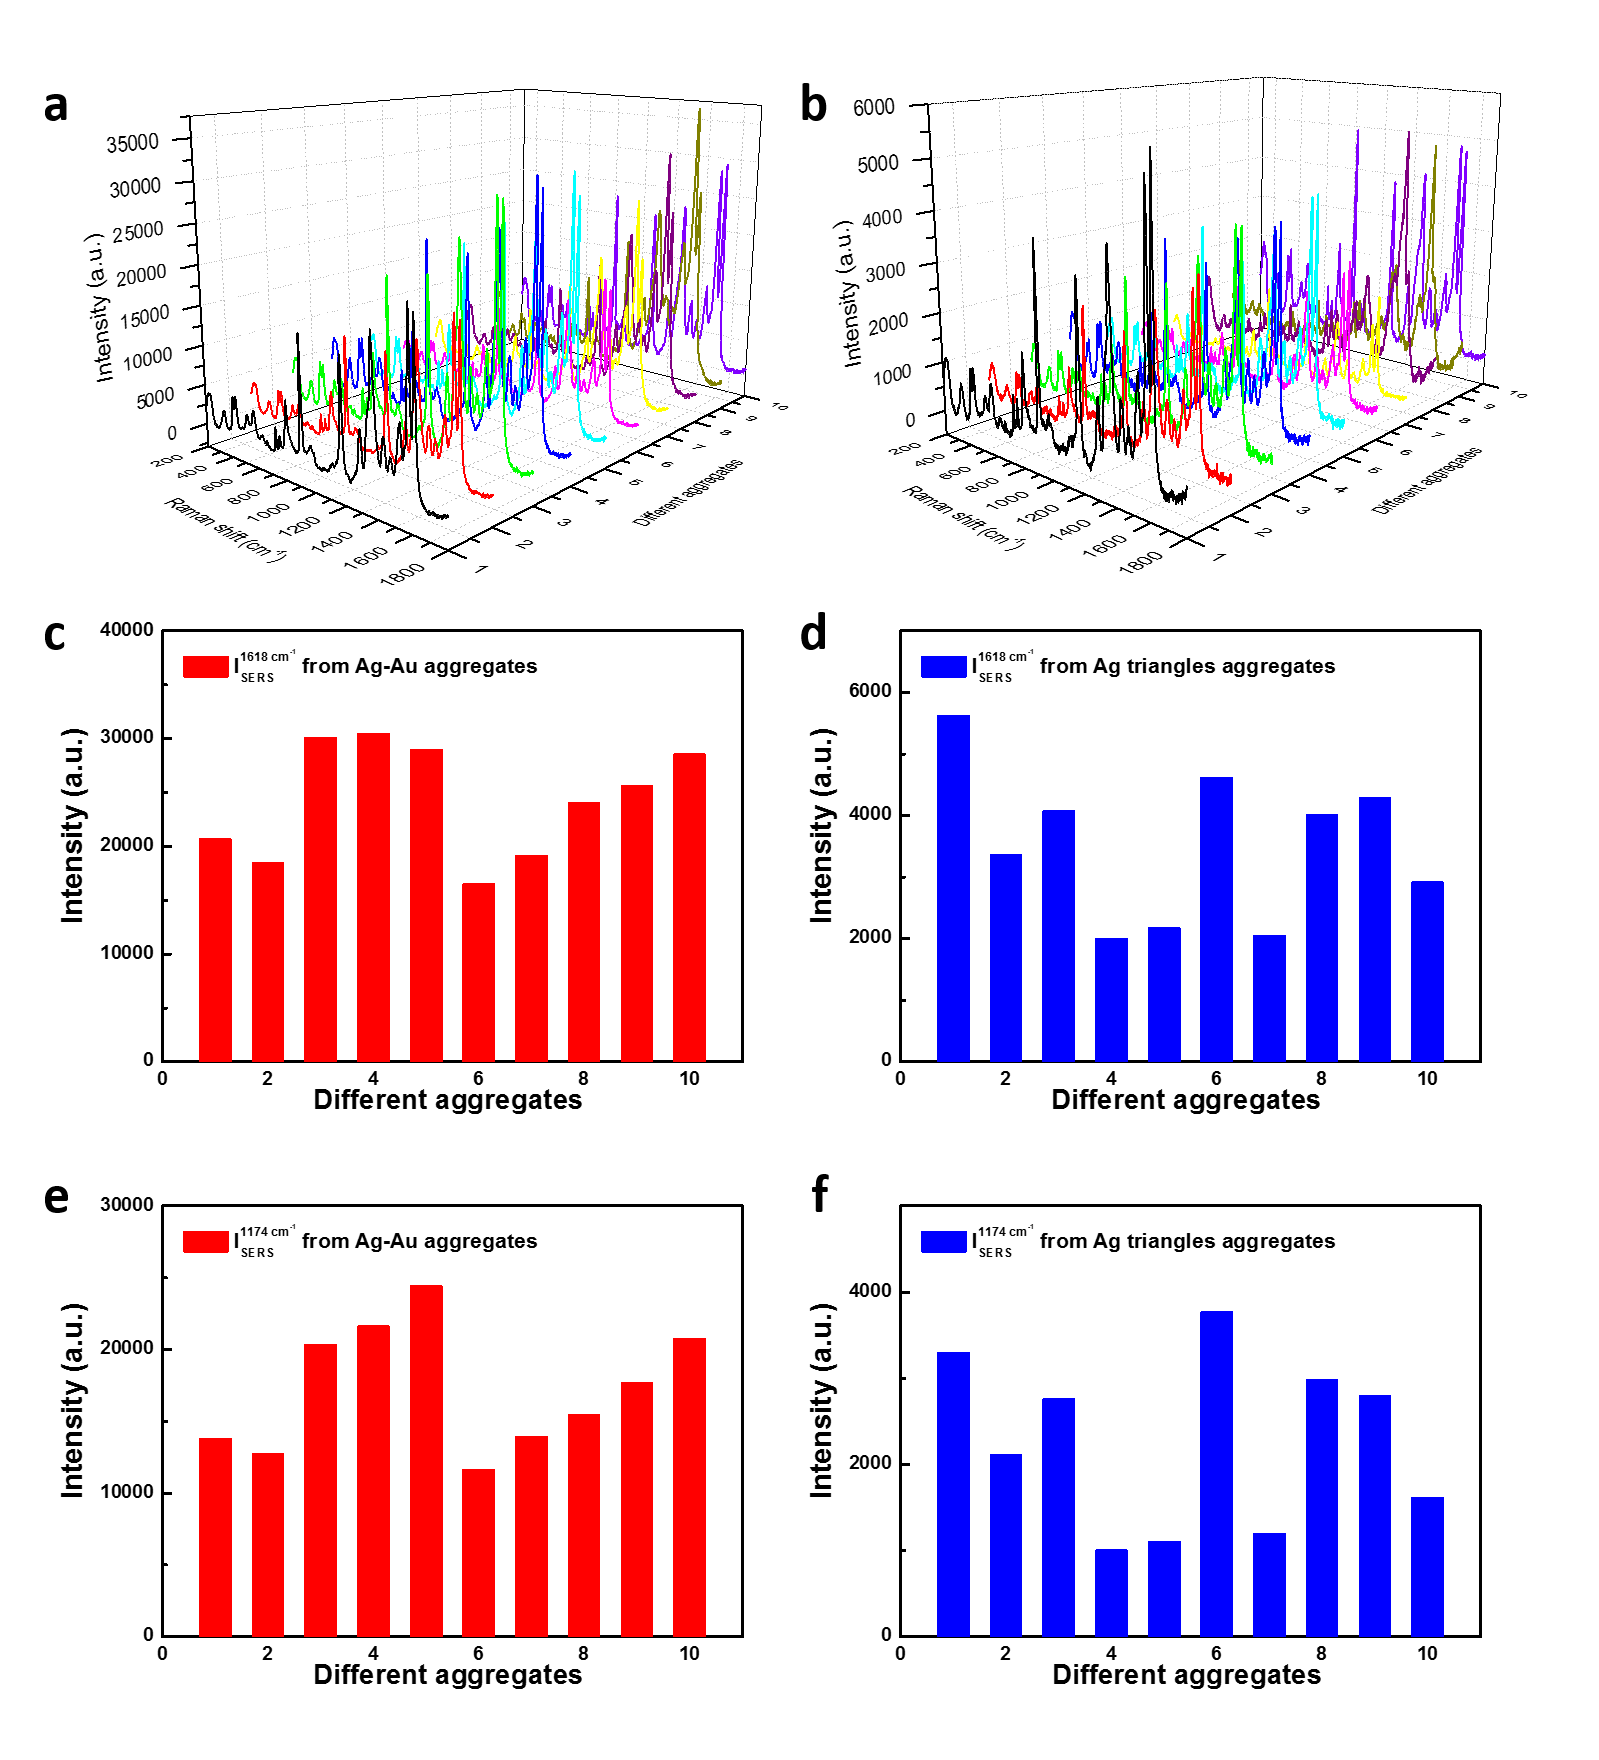


**Figure S4 The SERS reproducibility of Ag TNPs aggregates and Ag-Au TNPS aggregates.** The SERS spectra of CV from nanoporous Ag-Au TNPs (a) and Ag triangular aggregates (b). Raman signal intensity at 1618 cm-1 in SERS spectra from Ag-Au TNPs aggregates (c) and Ag triangular aggregates (d). Raman signal intensity at 1174 cm-1 in SERS spectra from Ag-Au TNPs (e) and Ag TNPs aggregates (f).
